# Supplementary material for: Shower water usage in Kruger National Park tourist accommodation: effectiveness of technology and information intervention to reduce use
Source: Royal Society of Chemistry journal article supplement (doi:10.1039/d1ew00914a), 2022-01-01

# USE WATER MEASUREDLY

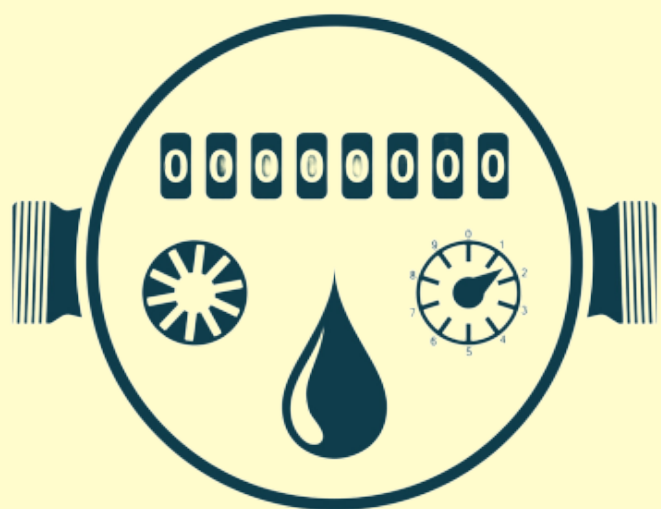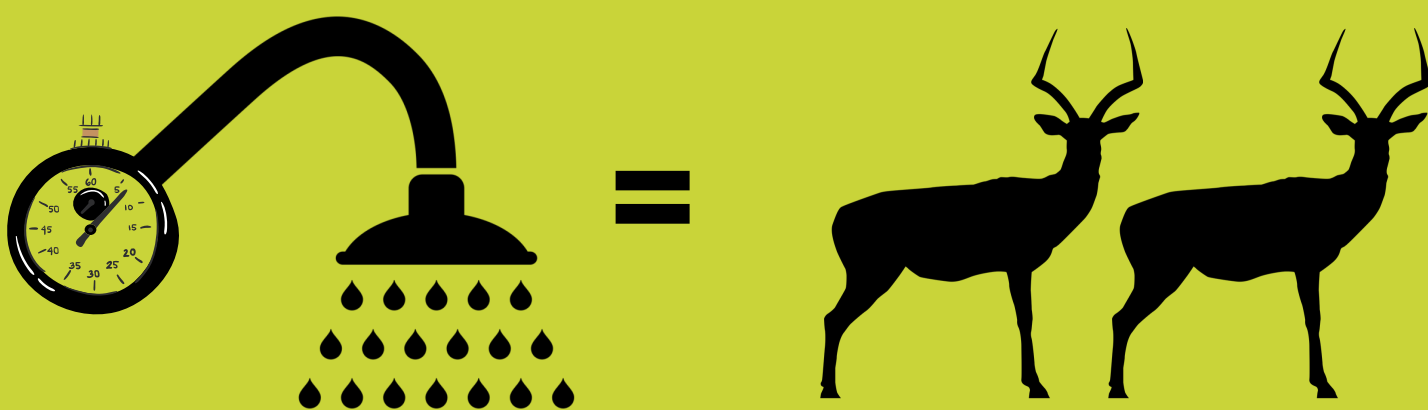

**1 MINUTE SHOWER = 8 LITRES WATER**

**For every minute you shower shorter, you save enough water for 2 impalas for a day**

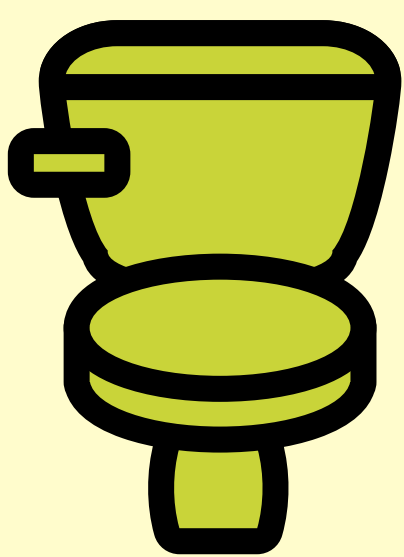

=

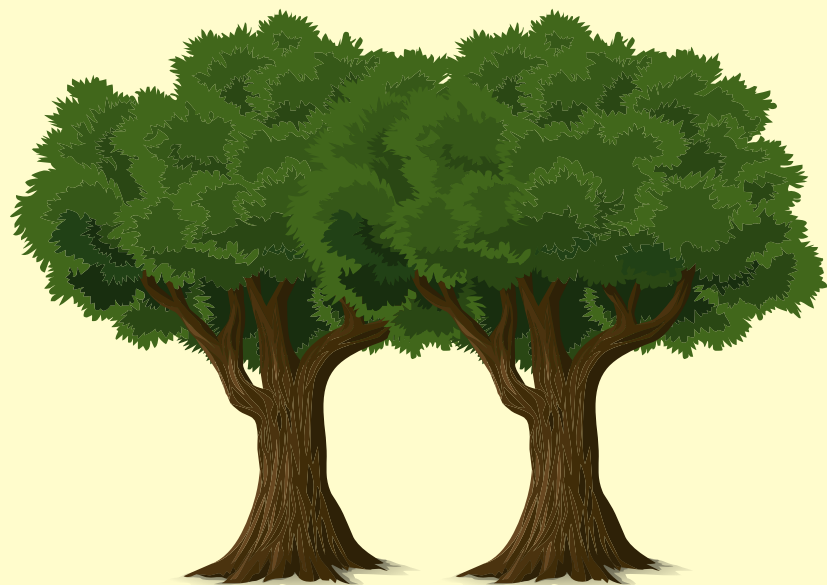

**1 TOILET FLUSH = 10 LITRES WATER**

**Every toilet flush equates to water for 2 average knobthorn trees per day - only flush when necessary**

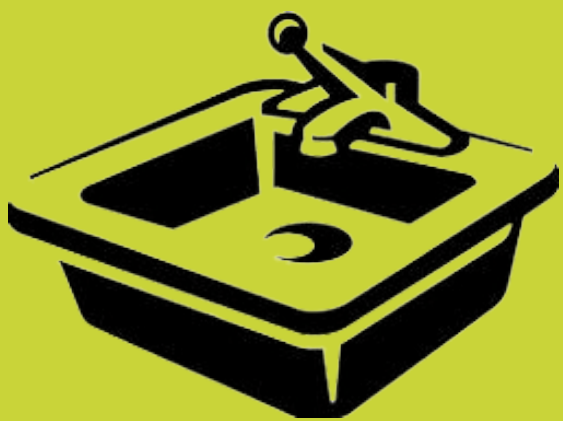

=

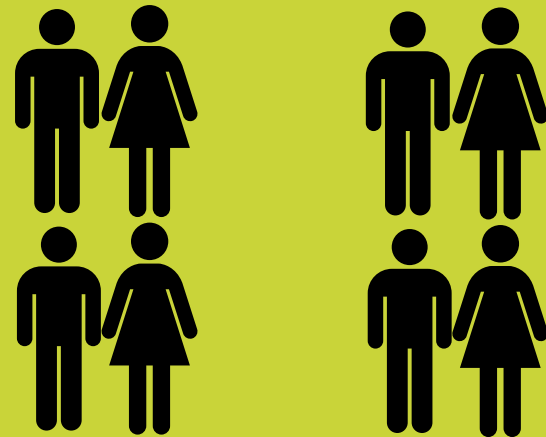

**FILLED SINK = 16 LITRES WATER**

**Fill half a sink and wash many items together rather than few at a time, saving up to 8 litres of drinking water for people dependent on the river**

**USE WATER TO SHOW YOU CARE  
FOR THOSE WITH WHOM YOU SHARE**

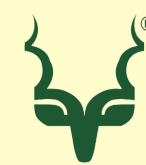

Supplement: d1ew00914a2.pdf [file d1ew00914a2.pdf]
