# Supplementary material for: Shower water usage in Kruger National Park tourist accommodation: effectiveness of technology and information intervention to reduce use
Source: Royal Society of Chemistry journal article supplement (doi:10.1039/d1ew00914a), 2022-01-01
Supplement: d1ew00914a4.pdf [file d1ew00914a4.pdf]

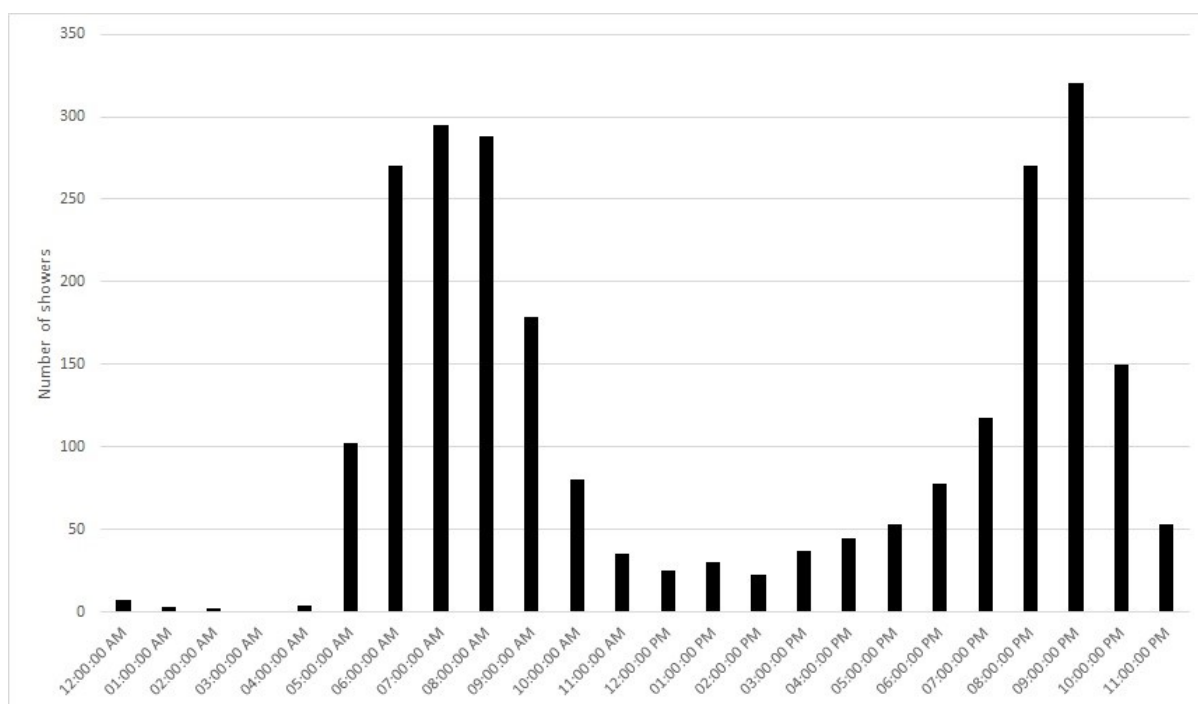

**Figure S4:** Frequency of occurrence of showers during the day, all discreet shower sessions from all treatments combined.
