# Supplementary material for: Shower water usage in Kruger National Park tourist accommodation: effectiveness of technology and information intervention to reduce use
Source: Royal Society of Chemistry journal article supplement (doi:10.1039/d1ew00914a), 2022-01-01
Supplement: d1ew00914a5.pdf [file d1ew00914a5.pdf]

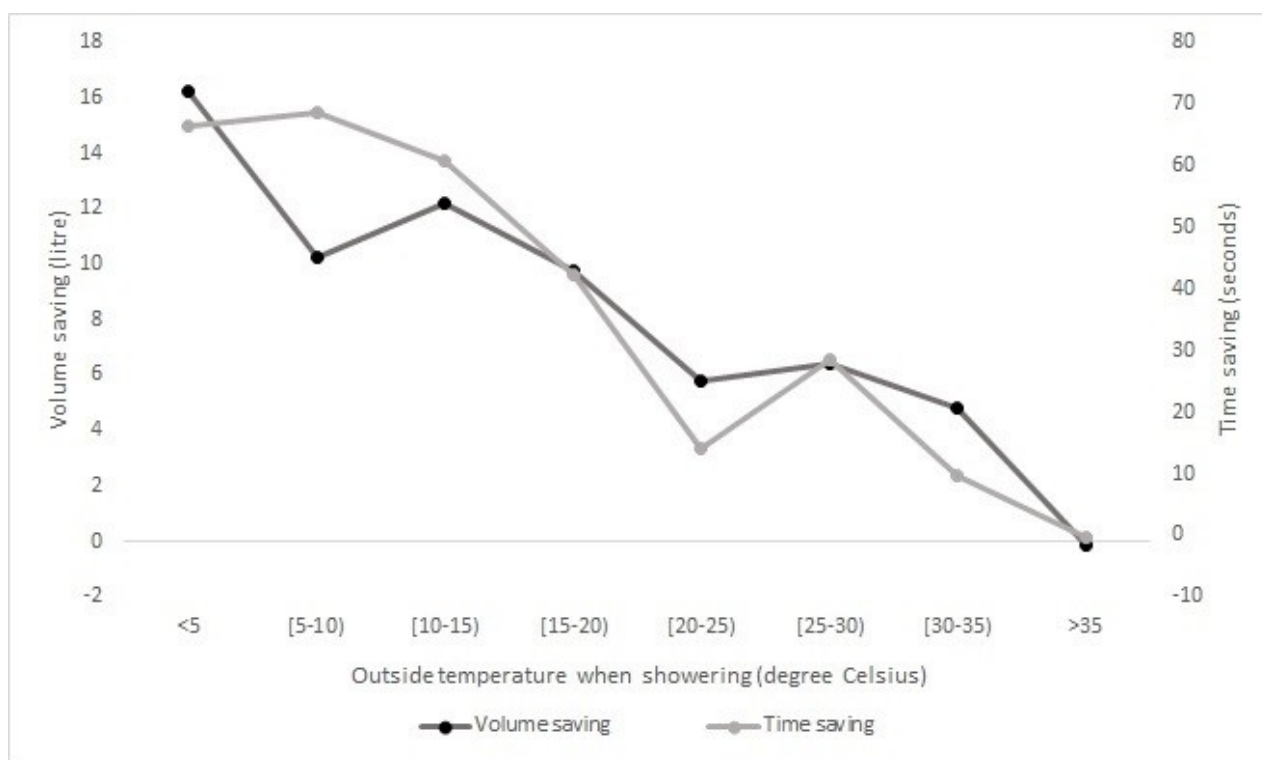

**Figure S5:** Average showering time and volume savings (C minus X) across a temperature gradient for the control (C) and Xerophyte (X) treatments (savings expressed on graph is Control – Xerophyte).
