# Supplementary figures and images for: Shower water usage in Kruger National Park tourist accommodation: effectiveness of technology and information intervention to reduce use
Source: Royal Society of Chemistry journal article supplement (doi:10.1039/d1ew00914a), 2022-01-01

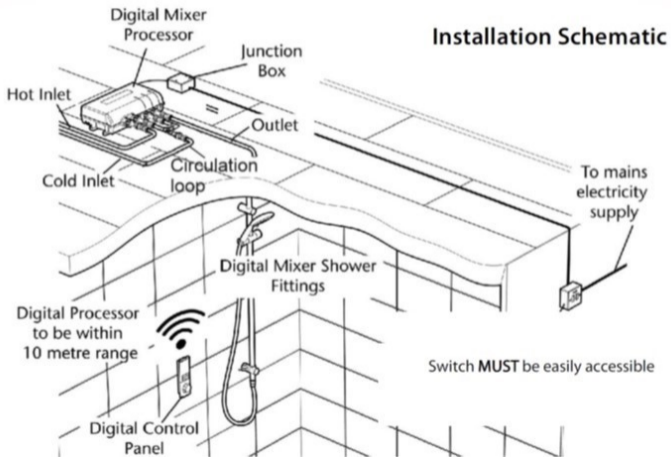

Supplement: d1ew00914a1.pdf [file d1ew00914a1.pdf]
